# Supplementary material for: Swelling-induced instabilities in microscale, surface-confined poly(N-isopropylacryamide) hydrogels
Source: Royal Society of Chemistry journal article supplement (doi:10.1039/c0sm00021c), 2010-01-01
Supplement: c0sm00021c.pdf [file c0sm00021c.pdf]

**Rotation of buckled gel.mpg:**

A three-dimensional reconstruction of a surface-confined gel in the bulk buckled state.

**Buckle formation from below.mpg:**

A three-dimensional reconstruction of a series of high aspect ratio microbeams transitioning from the collapsed state to a bulk buckled swollen state viewed from below the surface.

**Swelling of differential lateral swelling beams.mpg:**

A three-dimensional reconstruction of a series of low aspect ratio microbeams transitioning from a collapsed state to a swollen state giving rise to differential lateral swelling.

**Edge buckle formation.mpg:**

A three-dimensional reconstruction of the formation of localized edge buckling as the microbeam transitions from the collapsed state to the swollen state.

**Bulk buckle formation.mpg:**

A three-dimensional reconstruction of a series of high aspect ratio microbeams transitioning from the collapsed state to a swollen state which gives rise to a bulk buckling instability

**Rotation of differential lateral swelling beams.mpg:**

A three-dimensional reconstruction of two adjacent, low aspect ratio, microbeams in the swollen state forming an enclosed microchannel due to differential lateral swelling.
